# Supplementary material for: Modifications of EHPDB Physical Properties through Doping with Fe2O3 Nanoparticles (Part II)
Source: MDPI journal article supplement (doi:10.3390/ijms23010050), 2021-12-21
Supplement: s1 [file s1]

## Supplementary Material

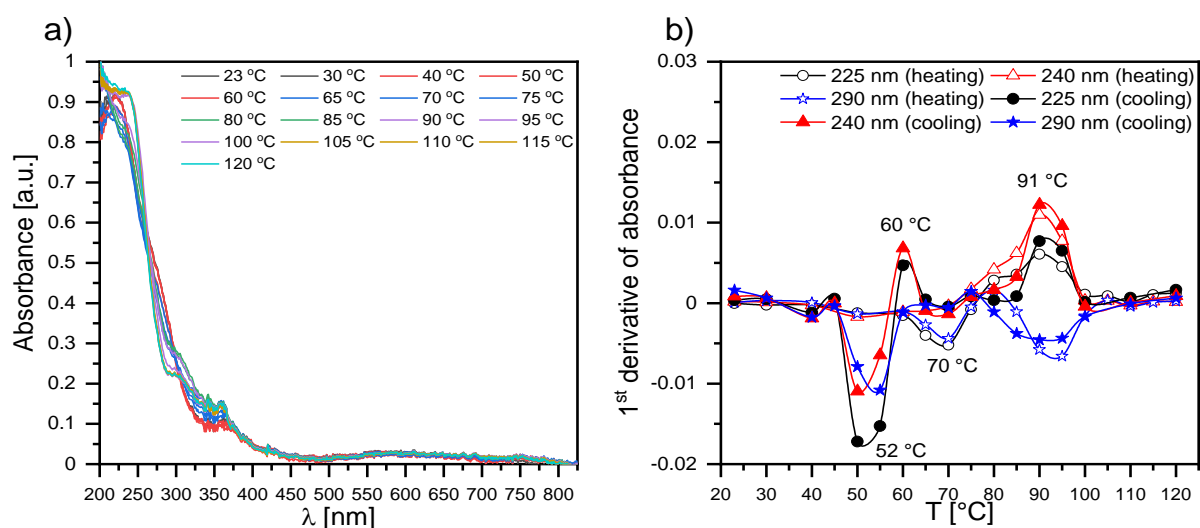

**Figure S1.** Solid state UV-Vis absorption spectra of Composite 1 (pure EHPDB) at several chosen temperatures in the 200–850 nm range during heating (a) and temperature dependence of the first derivative of the absorbance for selected wavelengths 225, 240 and 290 nm during heating and cooling (b).

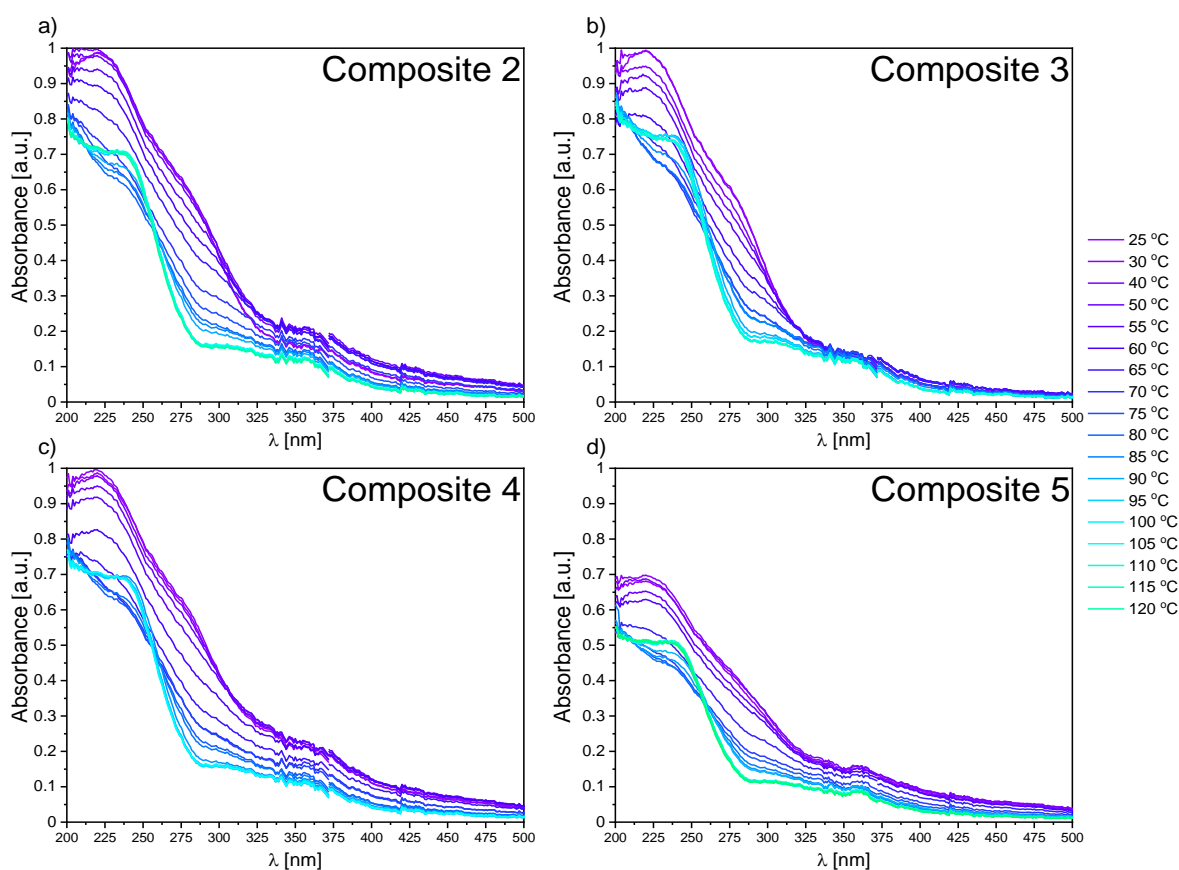

**Figure S2.** Solid state UV-Vis absorption spectra of Composites 2–5 at several chosen temperatures in the 200–500 nm range during heating. The legend from the right side is for all graphs.

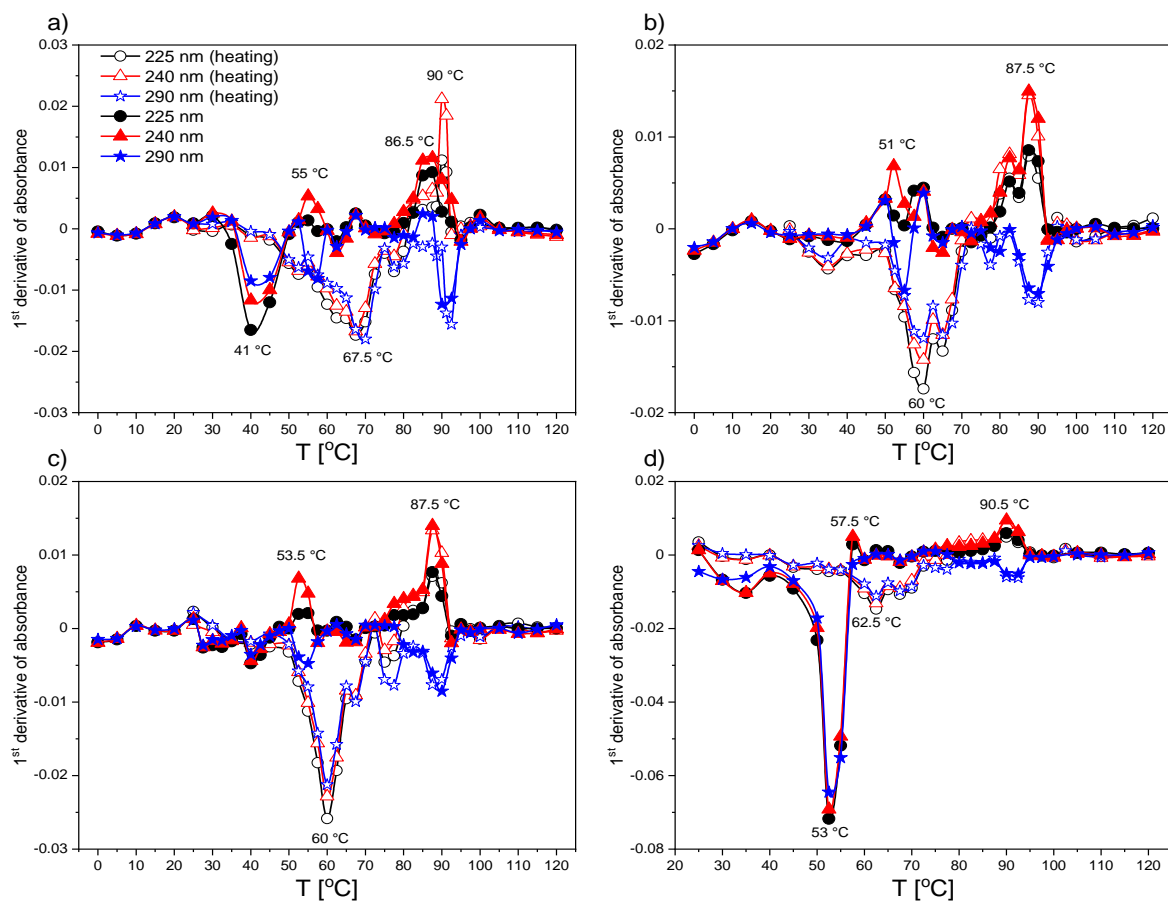

**Figure S3.** Temperature dependence of the first absorbance derivative for selected wavelengths (225, 240, 290 nm) for Composites 2–4 during heating and cooling. The given temperatures correspond to the phase transition temperatures.

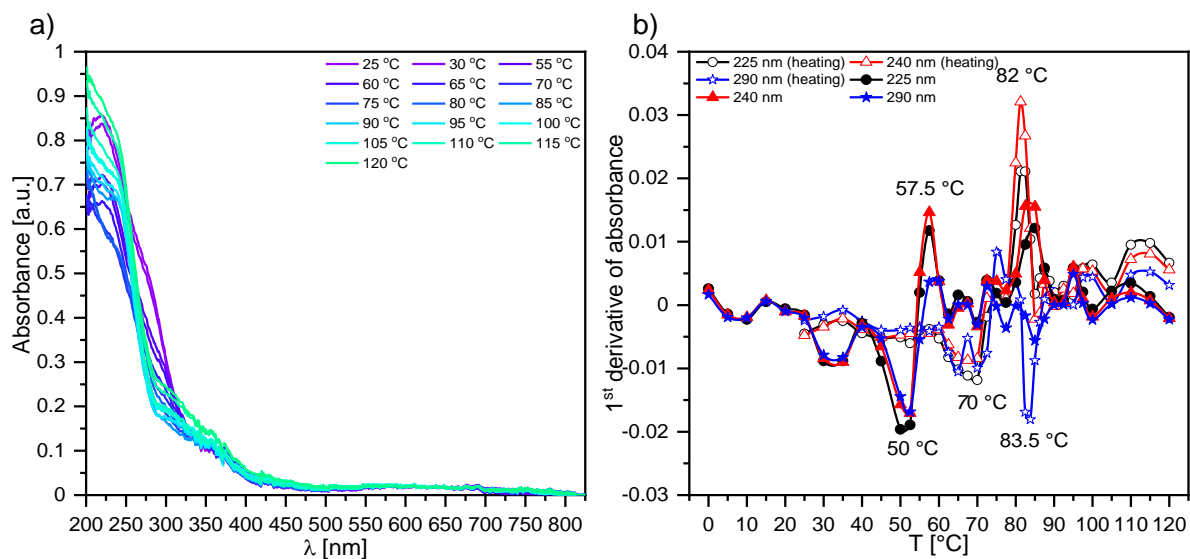

**Figure S4.** Solid state UV-Vis absorption spectra of Composite 6 at several chosen temperatures in the 200–850 nm range during heating (a) and temperature dependence of the first derivative of absorbance for selected wavelengths 225, 240 and 290 nm during heating and cooling (b).

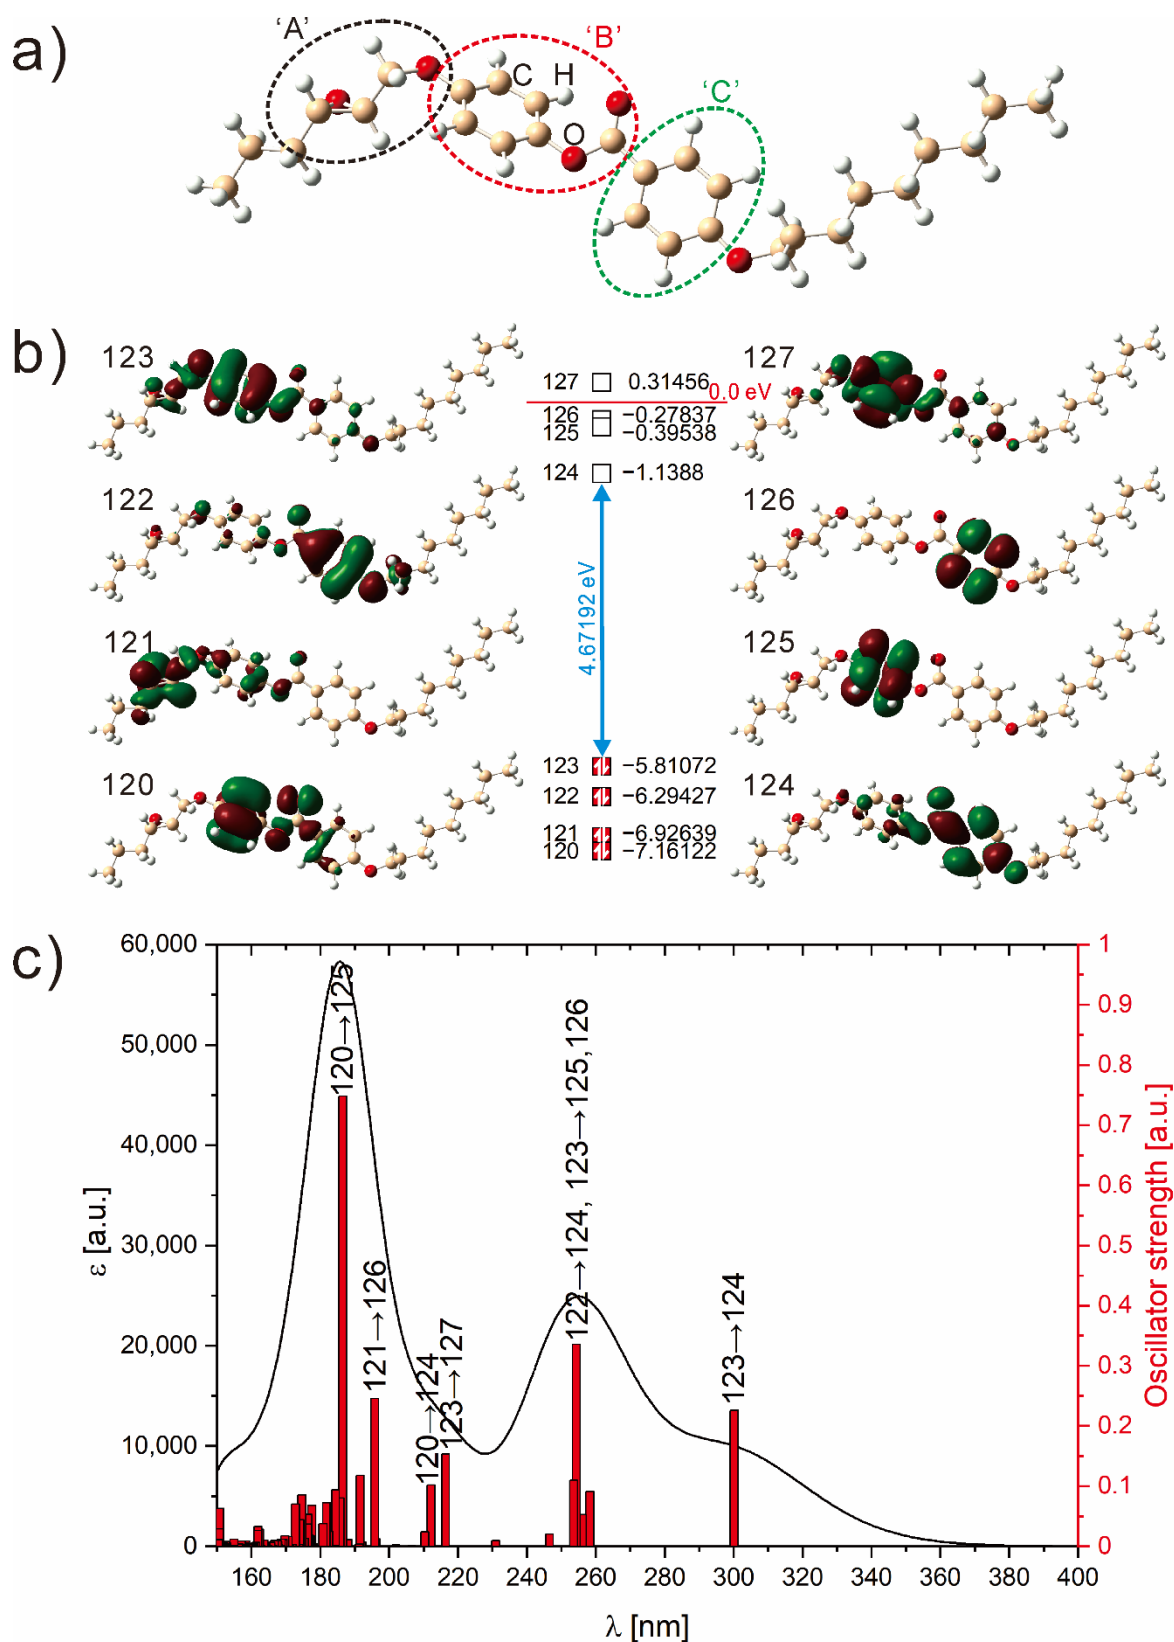

**Figure S5.** Model for optimized structure of EHPDB molecule used for calculation (a). Energy level diagram in eVs with calculated frontier molecular orbitals (b). Blue arrow and number correspond to the HOMO-LUMO gap. Calculated UV-Vis spectrum for optimized structure of EHPDB molecule (c). Red bars indicate electronic transitions with the largest contributions while legend above bars indicate electronic states involved in transition.

**Table S1.** List of atomic coordinates for optimized structure of EHPDB molecule.

| Atom | X       | Y        | Z      | Atom | X       | Y        | Z      |
|------|---------|----------|--------|------|---------|----------|--------|
| C    | 2.1355  | -1.7731  | 1.7295 | H    | 18.7163 | -6.4138  | 3.3196 |
| C    | 16.9662 | -6.67    | 1.4823 | H    | 19.5618 | -7.2845  | 0.4477 |
| O    | 17.5989 | -7.9895  | 1.7894 | H    | 19.3947 | -5.4226  | 0.8071 |
| C    | 18.3242 | -6.7769  | 2.2839 | H    | 15.8922 | -7.0283  | 3.4813 |
| C    | 19.539  | -6.4753  | 1.2862 | H    | 15.6587 | -5.2811  | 2.7627 |
| C    | 15.7528 | -6.413   | 2.5014 | H    | 20.8657 | -5.7703  | 2.9961 |
| C    | 20.9204 | -6.5073  | 2.0949 | H    | 21.1219 | -7.5865  | 2.4865 |
| C    | 22.0976 | -6.0631  | 1.1035 | H    | 21.7464 | -6.1956  | 0      |
| O    | 14.479  | -6.8472  | 1.8596 | H    | 22.3645 | -4.9446  | 1.2944 |
| C    | 13.2898 | -6.0524  | 1.8825 | H    | 23.0369 | -6.7264  | 1.2944 |
| C    | 11.9971 | -6.7122  | 1.9612 | H    | 11.9392 | -7.8749  | 2.019  |
| C    | 13.3565 | -4.5992  | 1.8143 | H    | 14.3911 | -4.0658  | 1.7538 |
| C    | 10.7765 | -5.9258  | 1.9678 | H    | 9.7435  | -6.4618  | 2.0306 |
| C    | 12.1328 | -3.8114  | 1.8217 | H    | 12.1885 | -2.6484  | 1.7677 |
| C    | 10.8396 | -4.4732  | 1.8963 | H    | 5.7912  | -5.2256  | 2.37   |
| O    | 9.6371  | -3.6925  | 1.8897 | H    | 8.1924  | -1.381   | 2.2373 |
| C    | 8.4122  | -4.1925  | 2.4323 | H    | 3.578   | -3.8497  | 2.1924 |
| O    | 8.393   | -5.3253  | 3.007  | H    | 5.9759  | 0        | 2.0545 |
| C    | 7.1139  | -3.3776  | 2.3165 | H    | 2.3423  | -2.4405  | 3.8919 |
| C    | 5.8328  | -4.0628  | 2.3017 | H    | 0.7655  | -1.4437  | 3.5125 |
| C    | 7.1637  | -1.9288  | 2.2274 | H    | 0       | -3.822   | 3.8548 |
| C    | 4.6036  | -3.2961  | 2.2017 | H    | 4E-4    | -3.5521  | 1.9704 |
| C    | 5.9322  | -1.1625  | 2.1258 | H    | 2.2389  | -4.7767  | 1.7185 |
| C    | 4.6462  | -1.8431  | 2.1131 | H    | 2.4766  | -4.8496  | 3.6058 |
| O    | 3.4319  | -1.0871  | 2.0103 | H    | 0.1743  | -6.2538  | 3.722  |
| C    | 1.4898  | -2.2664  | 3.1164 | H    | 0.2418  | -6.361   | 1.8226 |
| C    | 0.6709  | -3.6365  | 2.92   | H    | 2.5102  | -7.5705  | 1.9061 |
| C    | 1.6923  | -4.868   | 2.7438 | H    | 2.6407  | -7.2993  | 3.7857 |
| C    | 0.878   | -6.251   | 2.7929 | H    | 0.4021  | -8.6975  | 4.0916 |
| C    | 1.9063  | -7.4789  | 2.8987 | H    | 0.4111  | -9.0525  | 2.2214 |
| C    | 1.0777  | -8.8291  | 3.151  | H    | 2.7229  | -10.226  | 2.4276 |
| C    | 2.0861  | -10.0534 | 3.3884 | H    | 2.7911  | -9.81    | 4.284  |
| C    | 1.2389  | -11.3758 | 3.7158 | H    | 0.913   | -11.8846 | 2.719  |
| H    | 1.435   | -1.0144  | 1.189  | H    | 1.8962  | -12.115  | 4.3324 |
| H    | 2.3498  | -2.6756  | 1.0239 | H    | 0.2926  | -11.0877 | 4.3324 |
| H    | 16.6109 | -6.1354  | 0.5095 |      |         |          |        |

**Table S2.** List of calculated the first 25 excited states with oscillator strengths (f) for optimized structure of EHPDB molecule.

| The Excited State | Transition |          | $\Delta E$ [eV], $\lambda$ [nm],<br>Oscillator Strength [a.u.]                   |
|-------------------|------------|----------|----------------------------------------------------------------------------------|
| 1                 | 123 -> 124 | 0.70335  | Singlet-A, 4.1305 eV 300.17 nm f =<br>0.2260 $\langle S^{*2} \rangle \geq 0.000$ |
| 2                 | 118 -> 124 | -0.27413 | Singlet-A, 4.8001 eV 258.30 nm f =<br>0.0911 $\langle S^{*2} \rangle \geq 0.000$ |
|                   | 121 -> 124 | -0.36861 |                                                                                  |
|                   | 121 -> 127 | 0.15271  |                                                                                  |
|                   | 122 -> 124 | 0.23654  |                                                                                  |
|                   | 123 -> 126 | 0.44480  |                                                                                  |
| 3                 | 120 -> 124 | -0.34653 | Singlet-A, 4.8415 eV 256.09 nm f =<br>0.0528 $\langle S^{*2} \rangle \geq 0.000$ |
|                   | 122 -> 124 | -0.25683 |                                                                                  |
|                   | 122 -> 125 | 0.32247  |                                                                                  |
|                   | 123 -> 125 | 0.43452  |                                                                                  |
| 4                 | 118 -> 124 | -0.15895 | Singlet-A, 4.8737 eV 254.39 nm f =<br>0.3359 $\langle S^{*2} \rangle \geq 0.000$ |
|                   | 120 -> 124 | -0.15580 |                                                                                  |
|                   | 121 -> 127 | -0.12444 |                                                                                  |
|                   | 122 -> 124 | 0.50773  |                                                                                  |
|                   | 122 -> 125 | 0.16938  |                                                                                  |
|                   | 123 -> 125 | 0.10294  |                                                                                  |
|                   | 123 -> 126 | -0.34003 |                                                                                  |
| 5                 | 118 -> 124 | 0.45562  | Singlet-A, 4.8894 eV 253.58 nm f =<br>0.1100 $\langle S^{*2} \rangle \geq 0.000$ |
|                   | 121 -> 124 | 0.24850  |                                                                                  |
|                   | 121 -> 127 | 0.10203  |                                                                                  |
|                   | 122 -> 124 | 0.29195  |                                                                                  |
|                   | 123 -> 126 | 0.30331  |                                                                                  |
| 6                 | 120 -> 124 | 0.25940  | Singlet-A, 5.0289 eV 246.54 nm f =<br>0.0202 $\langle S^{*2} \rangle \geq 0.000$ |
|                   | 122 -> 125 | -0.37178 |                                                                                  |
|                   | 123 -> 125 | 0.53377  |                                                                                  |
| 7                 | 118 -> 124 | -0.40403 | Singlet-A, 5.3687 eV 230.94 nm f =<br>0.0098 $\langle S^{*2} \rangle \geq 0.000$ |
|                   | 121 -> 124 | 0.53980  |                                                                                  |
|                   | 123 -> 126 | 0.16477  |                                                                                  |
| 8                 | 122 -> 126 | 0.70133  | Singlet-A 5.5626 eV 222.89 nm f =<br>0.0002 $\langle S^{*2} \rangle \geq 0.000$  |
| 9                 | 121 -> 126 | -0.28317 | Singlet-A, 5.7308 eV 216.35 nm f =<br>0.1536 $\langle S^{*2} \rangle \geq 0.000$ |
|                   | 123 -> 127 | 0.62473  |                                                                                  |
| 10                | 119 -> 124 | 0.24260  | Singlet-A, 5.8430 eV 212.19 nm f =<br>0.1021 $\langle S^{*2} \rangle \geq 0.000$ |
|                   | 120 -> 124 | 0.48546  |                                                                                  |
|                   | 122 -> 125 | 0.40384  |                                                                                  |
| 11                | 119 -> 124 | 0.65286  | Singlet-A, 5.8942 eV 210.35 nm f =<br>0.0240 $\langle S^{*2} \rangle \geq 0.000$ |
|                   | 120 -> 124 | -0.15430 |                                                                                  |
|                   | 122 -> 125 | -0.17068 |                                                                                  |
| 12                | 118 -> 125 | 0.27758  | Singlet-A, 6.0051 eV 206.46 nm f =<br>0.0013 $\langle S^{*2} \rangle \geq 0.000$ |
|                   | 121 -> 125 | 0.64849  |                                                                                  |
| 13                | 120 -> 125 | 0.11877  | Singlet-A 6.1379 eV 202.00 nm f =<br>0.0024 $\langle S^{*2} \rangle \geq 0.000$  |
|                   | 122 -> 127 | 0.68693  |                                                                                  |
| 14                | 118 -> 125 | 0.62777  | Singlet-A, 6.3183 eV 196.23 nm f =<br>0.0122 $\langle S^{*2} \rangle \geq 0.000$ |
|                   | 121 -> 125 | -0.27155 |                                                                                  |
| 15                | 118 -> 125 | -0.12436 | Singlet-A, 6.3308 eV 195.84 nm f =<br>0.2456 $\langle S^{*2} \rangle \geq 0.000$ |
|                   | 118 -> 126 | 0.55308  |                                                                                  |

|    |            |          |                                                          |
|----|------------|----------|----------------------------------------------------------|
|    | 121 -> 126 | 0.31534  |                                                          |
|    | 123 -> 127 | 0.13476  |                                                          |
| 16 | 119 -> 126 | 0.37406  | Singlet-A, 6.4302 eV 192.81 nm f =<br>0.0009 <S**2>0.000 |
|    | 120 -> 126 | 0.56814  |                                                          |
|    | 121 -> 127 | -0.11596 |                                                          |
| 17 | 119 -> 126 | 0.41361  | Singlet-A, 6.4543 eV 192.09 nm f =<br>0.0068 <S**2>0.000 |
|    | 120 -> 126 | -0.38587 |                                                          |
|    | 121 -> 127 | -0.16811 |                                                          |
|    | 123 -> 129 | 0.31762  |                                                          |
|    | 123 -> 131 | 0.12462  |                                                          |
| 18 | 116 -> 124 | 0.23025  | Singlet-A, 6.4716 eV 191.58 nm f =<br>0.1179 <S**2>0.000 |
|    | 117 -> 124 | 0.59557  |                                                          |
|    | 121 -> 126 | 0.14132  |                                                          |
|    | 123 -> 129 | -0.15735 |                                                          |
| 19 | 117 -> 124 | 0.13988  | Singlet-A, 6.4811 eV 191.30 nm f =<br>0.0034 <S**2>0.000 |
|    | 118 -> 126 | -0.13327 |                                                          |
|    | 119 -> 126 | -0.34348 |                                                          |
|    | 120 -> 126 | 0.12315  |                                                          |
|    | 123 -> 129 | 0.49678  |                                                          |
|    | 123 -> 131 | 0.19739  |                                                          |
|    | 123 -> 133 | 0.10558  |                                                          |
| 20 | 122 -> 128 | 0.37823  | Singlet-A, 6.5932 eV 188.05 nm f =<br>0.0112 <S**2>0.000 |
|    | 123 -> 128 | 0.55861  |                                                          |
| 21 | 116 -> 124 | 0.20560  | Singlet-A, 6.6481 eV 186.50 nm f =<br>0.7486 <S**2>0.000 |
|    | 117 -> 124 | -0.21538 |                                                          |
|    | 118 -> 126 | -0.23947 |                                                          |
|    | 119 -> 125 | 0.21078  |                                                          |
|    | 120 -> 125 | 0.43376  |                                                          |
|    | 121 -> 126 | 0.22520  |                                                          |
| 22 | 116 -> 124 | -0.11393 | Singlet-A, 6.6743 eV 185.76 nm f =<br>0.0803 <S**2>0.000 |
|    | 119 -> 125 | 0.65434  |                                                          |
|    | 121 -> 126 | -0.10887 |                                                          |
| 23 | 112 -> 124 | 0.19937  | Singlet-A, 6.7207 eV 184.48 nm f =<br>0.0936 <S**2>0.000 |
|    | 116 -> 124 | 0.46500  |                                                          |
|    | 117 -> 124 | -0.17961 |                                                          |
|    | 118 -> 127 | -0.15722 |                                                          |
|    | 120 -> 125 | -0.23204 |                                                          |
|    | 121 -> 127 | -0.16804 |                                                          |
|    | 122 -> 128 | 0.13126  |                                                          |
|    | 123 -> 133 | -0.13578 |                                                          |
| 24 | 107 -> 124 | 0.15305  | Singlet-A, 6.7372 eV 184.03 nm f =<br>0.0015 <S**2>0.000 |
|    | 109 -> 124 | 0.26722  |                                                          |
|    | 110 -> 124 | -0.11988 |                                                          |
|    | 111 -> 124 | 0.19258  |                                                          |
|    | 112 -> 124 | 0.37539  |                                                          |
|    | 115 -> 124 | -0.33331 |                                                          |
|    | 116 -> 124 | -0.15318 |                                                          |
|    | 117 -> 124 | 0.10588  |                                                          |
|    | 120 -> 125 | 0.10294  |                                                          |
| 25 | 118 -> 127 | 0.19228  | Singlet-A, 6.7947 eV 182.47 nm f =<br>0.0245 <S**2>0.000 |
|    | 121 -> 127 | 0.21709  |                                                          |
|    | 122 -> 128 | 0.48744  |                                                          |

**Table S3.** List of atomic coordinates for ‘planar’ EHPDB molecule.

| Atom | X         | Y        | Z        | Atom | X         | Y        | Z        |
|------|-----------|----------|----------|------|-----------|----------|----------|
| C    | 5.47221   | -2.5107  | -0.60355 | H    | -10.23004 | 1.17922  | 1.29781  |
| C    | -8.36095  | 0.6968   | 0.22883  | H    | -9.8744   | -1.50468 | -0.21298 |
| O    | -9.40905  | 1.10694  | -0.66462 | H    | -10.40326 | -1.35721 | 1.47605  |
| C    | -9.77589  | 0.48124  | 0.57779  | H    | -8.21632  | 2.67209  | 1.02497  |
| C    | -10.44645 | -0.8687  | 0.48434  | H    | -7.16712  | 1.48542  | 1.85367  |
| C    | -7.5601   | 1.80383  | 0.87121  | H    | -12.47003 | -0.12974 | 0.71867  |
| C    | -11.9042  | -0.76885 | 0.01581  | H    | -11.92316 | -0.24832 | -0.9574  |
| C    | -12.58935 | -2.13099 | -0.10555 | H    | -12.06563 | -2.77879 | -0.82896 |
| O    | -6.50586  | 2.28139  | 0.03726  | H    | -12.60462 | -2.66137 | 0.86213  |
| C    | -5.30563  | 1.62408  | 0.01339  | H    | -13.63213 | -2.02738 | -0.44545 |
| C    | -4.32343  | 2.20238  | -0.80822 | H    | -4.58109  | 3.10741  | -1.36065 |
| C    | -4.99838  | 0.45943  | 0.73022  | H    | -5.73375  | -0.02747 | 1.36993  |
| C    | -3.05488  | 1.64129  | -0.91316 | H    | -2.30108  | 2.10473  | -1.54657 |
| C    | -3.71964  | -0.10115 | 0.62848  | H    | -3.46885  | -1.00818 | 1.181    |
| C    | -2.75459  | 0.48314  | -0.18589 | H    | 2.19216   | 1.1939   | -0.12605 |
| O    | -1.53805  | -0.19479 | -0.29163 | H    | -0.32046  | -2.2673  | -0.55797 |
| C    | -0.34738  | 0.48732  | -0.21758 | H    | 4.21594   | -0.22473 | -0.28934 |
| O    | -0.26804  | 1.68749  | -0.07975 | H    | 1.71232   | -3.71281 | -0.73686 |
| C    | 0.80844   | -0.43497 | -0.33055 | H    | 5.42346   | -1.59827 | 1.36278  |
| C    | 2.09576   | 0.11564  | -0.26092 | H    | 5.76511   | -3.33185 | 1.34584  |
| C    | 0.67427   | -1.82605 | -0.50097 | H    | 7.8058    | -2.19416 | 1.97041  |
| C    | 3.2316    | -0.68624 | -0.35595 | H    | 8.05161   | -2.86737 | 0.36064  |
| C    | 1.79831   | -2.63362 | -0.6002  | H    | 7.65893   | -0.59086 | -0.65686 |
| C    | 3.08899   | -2.0743  | -0.53074 | H    | 7.32997   | 0.0699   | 0.94753  |
| O    | 4.111     | -2.96026 | -0.65428 | H    | 9.67135   | -0.5212  | 1.66507  |
| C    | 5.98795   | -2.383   | 0.8297   | H    | 9.99448   | -1.19774 | 0.06735  |
| C    | 7.4936    | -2.09    | 0.91643  | H    | 9.5793    | 1.06237  | -0.97497 |
| C    | 7.91473   | -0.7027  | 0.41286  | H    | 9.25435   | 1.73951  | 0.62222  |
| C    | 9.41002   | -0.42028 | 0.59476  | H    | 11.59711  | 1.14814  | 1.34974  |
| C    | 9.84067   | 0.96285  | 0.09565  | H    | 11.92195  | 0.46959  | -0.24711 |
| C    | 11.33503  | 1.24648  | 0.27903  | H    | 11.50415  | 2.72691  | -1.29083 |
| C    | 11.76613  | 2.6294   | -0.22093 | H    | 11.17939  | 3.40508  | 0.30521  |
| C    | 13.26003  | 2.90345  | -0.03344 | H    | 13.87388  | 2.16538  | -0.57767 |
| H    | 6.03464   | -3.29306 | -1.13621 | H    | 13.5376   | 3.90409  | -0.40215 |
| H    | 5.58344   | -1.57559 | -1.17684 | H    | 13.54658  | 2.84885  | 1.0308   |
| H    | -7.78272  | -0.16538 | -0.12775 |      |           |          |          |

**Table S4.** List of calculated the first 25 excited states with oscillator strengths (f) for ‘planar’ EHPDB molecule.

| The Excited State | Transition |          | $\Delta E$ [eV], $\lambda$ [nm],<br>Oscillator Strength [a.u.]                |
|-------------------|------------|----------|-------------------------------------------------------------------------------|
| 1                 | 123 -> 124 | 0.70328  | Singlet-A, 3.7065 eV 334.50 nm f =<br>0.2535 $\langle S^2 \rangle \geq 0.000$ |
|                   | 117 -> 124 | -0.15514 |                                                                               |
|                   | 118 -> 124 | 0.15592  |                                                                               |
| 2                 | 119 -> 124 | -0.35303 | Singlet-A, 4.1199 eV 300.94 nm f =<br>0.0739 $\langle S^2 \rangle \geq 0.000$ |
|                   | 120 -> 124 | 0.12629  |                                                                               |
|                   | 121 -> 124 | -0.35605 |                                                                               |
|                   | 122 -> 124 | 0.39191  |                                                                               |
| 3                 | 120 -> 124 | -0.31977 | Singlet-A, 4.4230 eV 280.31 nm f =<br>0.0097 $\langle S^2 \rangle \geq 0.000$ |
|                   | 122 -> 125 | 0.28814  |                                                                               |

|    |            |          |                                                          |
|----|------------|----------|----------------------------------------------------------|
|    | 123 -> 125 | 0.54506  |                                                          |
| 4  | 121 -> 124 | -0.39317 | Singlet-A, 4.4371 eV 279.42 nm f =<br>0.1201 <S**2>0.000 |
|    | 121 -> 127 | 0.16869  |                                                          |
|    | 122 -> 124 | -0.28707 |                                                          |
|    | 123 -> 126 | 0.46020  |                                                          |
| 5  | 120 -> 124 | 0.33583  | Singlet-A, 4.5315 eV 273.60 nm f =<br>0.0463 <S**2>0.000 |
|    | 122 -> 124 | -0.24274 |                                                          |
|    | 122 -> 125 | -0.35422 |                                                          |
|    | 123 -> 125 | 0.39292  |                                                          |
|    | 123 -> 126 | -0.14252 |                                                          |
| 6  | 118 -> 124 | -0.11928 | Singlet-A, 4.5857 eV 270.37 nm f =<br>0.2036 <S**2>0.000 |
|    | 119 -> 124 | 0.30990  |                                                          |
|    | 120 -> 124 | 0.11627  |                                                          |
|    | 121 -> 124 | 0.12768  |                                                          |
|    | 121 -> 127 | 0.10476  |                                                          |
|    | 122 -> 124 | 0.40008  |                                                          |
|    | 122 -> 125 | -0.20588 |                                                          |
|    | 123 -> 125 | 0.20816  |                                                          |
| 7  | 123 -> 126 | 0.26267  | Singlet-A, 4.7730 eV 259.76 nm f =<br>0.0305 <S**2>0.000 |
|    | 117 -> 124 | -0.12542 |                                                          |
|    | 118 -> 124 | 0.12843  |                                                          |
|    | 119 -> 124 | -0.32172 |                                                          |
|    | 121 -> 124 | 0.43825  |                                                          |
|    | 121 -> 127 | 0.16494  |                                                          |
| 8  | 123 -> 126 | 0.33756  | Singlet-A, 5.2327 eV 236.94 nm f =<br>0.1533 <S**2>0.000 |
|    | 121 -> 126 | -0.23526 |                                                          |
|    | 122 -> 126 | 0.11869  |                                                          |
| 9  | 123 -> 127 | 0.62160  | Singlet-A, 5.2791 eV 234.86 nm f =<br>0.0591 <S**2>0.000 |
|    | 119 -> 125 | 0.13200  |                                                          |
|    | 120 -> 124 | -0.35113 |                                                          |
|    | 121 -> 125 | 0.40235  |                                                          |
|    | 122 -> 125 | -0.37373 |                                                          |
| 10 | 123 -> 127 | 0.11784  | Singlet-A, 5.3602 eV 231.30 nm f =<br>0.0563 <S**2>0.000 |
|    | 120 -> 124 | 0.30226  |                                                          |
|    | 121 -> 125 | 0.54606  |                                                          |
| 11 | 122 -> 125 | 0.25095  | Singlet-A, 5.3940 eV 229.86 nm f =<br>0.0277 <S**2>0.000 |
|    | 119 -> 126 | -0.11192 |                                                          |
|    | 122 -> 126 | 0.66766  |                                                          |
| 12 | 123 -> 127 | -0.12259 | Singlet-A, 5.4341 eV 228.16 nm f =<br>0.0031 <S**2>0.000 |
|    | 117 -> 124 | -0.19378 |                                                          |
|    | 118 -> 124 | 0.58031  |                                                          |
| 13 | 119 -> 124 | 0.32559  | Singlet-A, 5.5323 eV 224.11 nm f =<br>0.0036 <S**2>0.000 |
|    | 115 -> 124 | 0.12820  |                                                          |
|    | 117 -> 124 | 0.60097  |                                                          |
|    | 118 -> 124 | 0.30094  |                                                          |
| 14 | 119 -> 124 | -0.12426 | Singlet-A, 5.6847 eV 218.10 nm f =<br>0.0237 <S**2>0.000 |
|    | 117 -> 125 | 0.15184  |                                                          |
|    | 118 -> 125 | -0.19546 |                                                          |
|    | 119 -> 125 | 0.50366  |                                                          |
|    | 120 -> 125 | -0.27682 |                                                          |
|    | 121 -> 125 | -0.16855 |                                                          |
|    | 122 -> 127 | -0.25127 |                                                          |



|    |            |          |                                                          |
|----|------------|----------|----------------------------------------------------------|
| 15 | 118 -> 125 | -0.10816 | Singlet-A, 5.7222 eV 216.67 nm f =<br>0.0032 <S**2>0.000 |
|    | 119 -> 125 | 0.29022  |                                                          |
|    | 120 -> 125 | 0.11133  |                                                          |
|    | 122 -> 127 | 0.59092  |                                                          |
| 16 | 116 -> 124 | 0.13723  | Singlet-A, 5.8422 eV 212.22 nm f =<br>0.2235 <S**2>0.000 |
|    | 118 -> 126 | -0.10566 |                                                          |
|    | 119 -> 126 | 0.42070  |                                                          |
|    | 120 -> 126 | -0.17106 |                                                          |
|    | 121 -> 126 | 0.39124  |                                                          |
|    | 122 -> 127 | -0.11257 |                                                          |
|    | 123 -> 127 | 0.10427  |                                                          |
| 17 | 123 -> 128 | -0.17375 | Singlet-A, 5.8828 eV 210.76 nm f =<br>0.0065 <S**2>0.000 |
|    | 114 -> 124 | 0.10177  |                                                          |
| 18 | 116 -> 124 | 0.66601  | Singlet-A, 5.9471 eV 208.48 nm f =<br>0.0369 <S**2>0.000 |
|    | 119 -> 126 | 0.25900  |                                                          |
|    | 120 -> 125 | -0.11406 |                                                          |
|    | 120 -> 126 | -0.11429 |                                                          |
|    | 121 -> 126 | -0.10412 |                                                          |
|    | 123 -> 128 | 0.57129  |                                                          |
|    | 123 -> 130 | 0.11413  |                                                          |
| 19 | 119 -> 126 | -0.15914 | Singlet-A, 6.0095 eV 206.31 nm f =<br>0.0038 <S**2>0.000 |
|    | 120 -> 126 | 0.10989  |                                                          |
|    | 121 -> 127 | 0.11700  |                                                          |
|    | 123 -> 130 | 0.59928  |                                                          |
|    | 123 -> 131 | -0.16079 |                                                          |
|    | 123 -> 138 | -0.12987 |                                                          |
| 20 | 115 -> 124 | 0.34686  | Singlet-A, 6.0471 eV 205.03 nm f =<br>0.0229 <S**2>0.000 |
|    | 117 -> 124 | -0.11531 |                                                          |
|    | 117 -> 126 | -0.22305 |                                                          |
|    | 118 -> 126 | 0.10840  |                                                          |
|    | 119 -> 127 | 0.19956  |                                                          |
|    | 120 -> 125 | 0.10035  |                                                          |
|    | 121 -> 127 | 0.38777  |                                                          |
|    | 123 -> 126 | -0.13044 |                                                          |
| 21 | 123 -> 130 | -0.15059 | Singlet-A, 6.1044 eV 203.11 nm f =<br>0.4016 <S**2>0.000 |
|    | 115 -> 124 | 0.39247  |                                                          |
|    | 117 -> 126 | 0.22897  |                                                          |
|    | 119 -> 125 | 0.10519  |                                                          |
|    | 119 -> 126 | -0.13490 |                                                          |
|    | 120 -> 125 | 0.24255  |                                                          |
|    | 121 -> 126 | 0.15604  |                                                          |
|    | 121 -> 127 | -0.23771 |                                                          |
|    | 122 -> 127 | -0.13954 |                                                          |
|    | 122 -> 128 | -0.11262 |                                                          |
| 22 | 123 -> 128 | 0.17716  | Singlet-A, 6.1447 eV 201.77 nm f =<br>0.0063 <S**2>0.000 |
|    | 112 -> 124 | 0.10525  |                                                          |
|    | 113 -> 124 | -0.10746 |                                                          |
|    | 114 -> 124 | 0.31542  |                                                          |
|    | 115 -> 124 | 0.26422  |                                                          |
|    | 116 -> 124 | -0.11814 |                                                          |
|    | 119 -> 126 | 0.10383  |                                                          |
|    | 120 -> 125 | -0.29128 |                                                          |

|    |            |          |                                                          |
|----|------------|----------|----------------------------------------------------------|
|    | 120 -> 126 | 0.34837  |                                                          |
|    | 121 -> 126 | 0.12390  |                                                          |
| 23 | 114 -> 124 | -0.18238 | Singlet-A, 6.1484 eV 201.65 nm f =<br>0.0947 <S**2>0.000 |
|    | 115 -> 124 | -0.14505 |                                                          |
|    | 119 -> 126 | 0.17306  |                                                          |
|    | 120 -> 125 | 0.22991  |                                                          |
|    | 120 -> 126 | 0.55219  |                                                          |
| 24 | 117 -> 125 | -0.13124 | Singlet-A, 6.1771 eV 200.72 nm f =<br>0.0022 <S**2>0.000 |
|    | 118 -> 125 | 0.62448  |                                                          |
|    | 119 -> 125 | 0.28416  |                                                          |
| 25 | 112 -> 124 | 0.17334  | Singlet-A, 6.2169 eV 199.43 nm f =<br>0.1866 <S**2>0.000 |
|    | 113 -> 124 | -0.11065 |                                                          |
|    | 114 ->124  | 0.45043  |                                                          |
|    | 115 -> 124 | -0.19646 |                                                          |
|    | 120 -> 125 | 0.26942  |                                                          |
|    | 122 -> 127 | -0.11567 |                                                          |
|    | 122 -> 128 | -0.14503 |                                                          |
|    | 123 -> 128 | 0.14629  |                                                          |

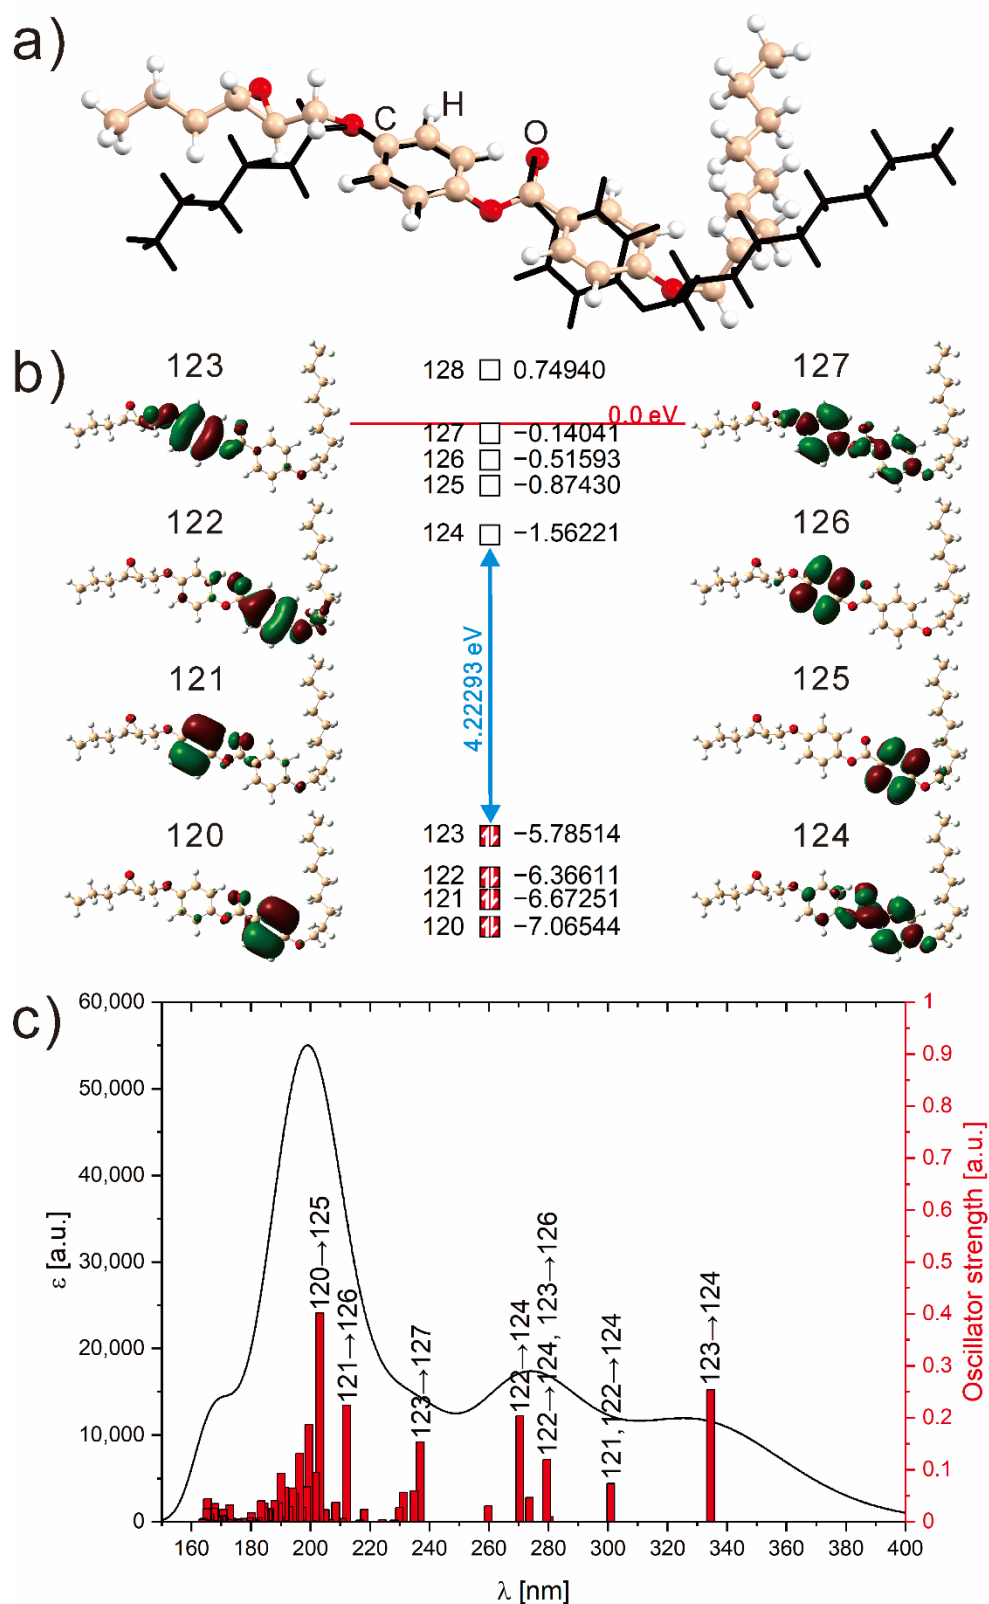

**Figure S6.** Model of 'planar' EHPDB molecule used for calculation (a). Black sticks indicate an overlapped optimized structure of EHPDB. Energy level diagram in eVs with calculated frontier molecular orbitals (b). Blue arrow and number correspond to the HOMO-LUMO gap. Calculated UV-Vis spectrum for 'planar' EHPDB molecule (c). Red bars indicate electronic transitions with the largest contributions while legend above bars indicate electronic states involved in transition.
